1 Energy conservation via hydrogen cycling in the methanogenic archaeon

2 *Methanosarcina barkeri*

3

4 Gargi Kulkarni,<sup>a\*</sup> Thomas D. Mand,<sup>a</sup> William W. Metcalf<sup>a,b#</sup>

5

6 <sup>a</sup>Department of Microbiology, University of Illinois at Urbana-Champaign, Illinois, USA

7 <sup>b</sup>Carl R. Woese Institute for Genomic Biology, University of Illinois at Urbana-

8 Champaign, Illinois, USA

9

10 Running Head: Energy conservation via H<sub>2</sub> cycling in *M. barkeri*

11

12 #Address correspondence to William W. Metcalf, metcalf@illinois.edu.

13 \*Present address: Gargi Kulkarni, Department of Biology, California Institute of

14 Technology, Pasadena, California, USA

15

16 Abstract word count: 208

17 Importance word count: 88

18 Main text word count: 3579

19

## 20 **Abstract**

21 Energy conservation via hydrogen cycling, which generates proton motive force  
22 by intracellular H<sub>2</sub> production coupled to extracellular consumption, has been  
23 controversial since it was first proposed in 1981. It was hypothesized that the  
24 methanogenic archaeon *Methanosarcina barkeri* is capable of energy conservation via  
25 H<sub>2</sub> cycling, based on genetic data that suggest H<sub>2</sub> is a preferred, but non-essential,  
26 intermediate in the electron transport chain of this organism. Here, we characterize a  
27 series of hydrogenase mutants to provide direct evidence of H<sub>2</sub> cycling. *M. barkeri*  
28 produces H<sub>2</sub> during growth on methanol, a phenotype that is lost upon mutation of the  
29 cytoplasmic hydrogenase encoded by *frhADGB*, although low levels of H<sub>2</sub>, attributable  
30 to the Ech hydrogenase, accumulate during stationary phase. In contrast, mutations that  
31 conditionally inactivate the extracellular Vht hydrogenase are lethal when expression of  
32 the *vhtGACD* operon is repressed. Under these conditions H<sub>2</sub> accumulates, with  
33 concomitant cessation of methane production and subsequent cell lysis, suggesting that  
34 the inability to recapture extracellular H<sub>2</sub> is responsible for the lethal phenotype.  
35 Consistent with this interpretation, double mutants that lack both Vht and Frh are viable.  
36 Thus, when intracellular hydrogen production is abrogated, loss of extracellular H<sub>2</sub>  
37 consumption is no longer lethal. The common occurrence of both intracellular and  
38 extracellular hydrogenases in anaerobic microorganisms suggests that this unusual  
39 mechanism of energy conservation may be widespread in nature.

40

## 41 **Importance**

42 Adenosine triphosphate (ATP) is required by all living organisms to facilitate  
43 essential endergonic reactions required for growth and maintenance. Although  
44 synthesis of ATP by substrate-level phosphorylation is widespread and significant, most  
45 ATP is made via the enzyme ATP synthase, which is energized by transmembrane  
46 chemiosmotic gradients. Therefore, establishing this gradient across the membrane is  
47 of central importance to sustaining life. Experimental validation of H<sub>2</sub> cycling adds to a  
48 short list of mechanisms for generating a transmembrane electrochemical gradient that  
49 is likely to be widespread, especially among anaerobic microorganisms.

50

## 51 **Introduction**

52 An essential requirement for life is the ability to couple exergonic metabolism to  
53 the endergonic synthesis of adenosine triphosphate (ATP). While some ATP is made by  
54 direct phosphorylation of adenosine diphosphate using “high-energy” metabolites such  
55 as phosphoenolpyruvate or 1,3-diphosphoglycerate, the vast majority is produced via  
56 the enzyme ATP synthase using energy stored in a transmembrane proton (or sodium)  
57 gradient. These electrochemical gradients are typically established during the process  
58 of electron transport by membrane proteins that couple exergonic redox reactions to  
59 generation of an ion-motive force by one of three general mechanisms: (i) vectorial  
60 proton pumping, (ii) scalar movement of protons across the membrane, as in the Q-  
61 cycle or Q-loop, or (iii) coupled reactions that consume protons within the cell and  
62 produce protons on the outside (1, 2). Given the importance of this process, it is not  
63 surprising that this central aspect of living systems has been the subject of intense  
64 study (and at least three Nobel Prizes). Indeed, we now possess a detailed, molecular-

65 level understanding of chemiosmotic energy conservation as it applies to  
66 photosynthesis and aerobic respiration in a wide variety of organisms including  
67 eukaryotes, bacteria, and archaea. Nevertheless, unique and sometimes surprising  
68 mechanisms for generation of chemiosmotic gradients continue to be found, including  
69 sodium-pumping methyltransferases in methanogenic archaea (3), electrogenic  
70 formate:oxalate antiporters in bacteria (4, 5), and light-driven, proton-pumping  
71 rhodopsins (6).

72 A controversial, and as yet unproven, mechanism for creating transmembrane  
73 proton gradients called H<sub>2</sub> cycling was proposed by Odom and Peck in 1981 to explain  
74 ATP synthesis in sulfate-reducing bacteria (7). In this proposed energy-conserving  
75 process, protons in the cytosol are reduced to molecular H<sub>2</sub> by enzymes known as  
76 hydrogenases. The H<sub>2</sub> so produced then diffuses across the membrane where it is re-  
77 oxidized by extracellular hydrogenases, releasing protons that contribute to a trans-  
78 membrane proton gradient that can be used to make ATP. The electrons produced by  
79 this reaction are returned to the cytoplasm via a membrane-bound electron transport  
80 chain, completing the redox process.

81 Although H<sub>2</sub> cycling has been suggested to occur in a number of anaerobic  
82 organisms (7-11), the hydrogen cycling hypothesis has not been widely accepted. A key  
83 argument against the idea is based on the high diffusion rate of molecular hydrogen.  
84 Thus, unless extracellular recapture is exceptionally efficient, hydrogen produced in the  
85 cytoplasm would be easily lost, resulting in redox imbalance and presumably cell death.  
86 Nevertheless, experimental demonstration of simultaneous production and consumption  
87 of H<sub>2</sub> by *Desulfovibrio* supports the model (12), as does metabolic modeling (13).

88 However, other data are inconsistent with the idea, including the ability of hydrogenase  
89 mutants to grow on lactate (14) and the inability of high external H<sub>2</sub> pressures to inhibit  
90 substrate catabolism (15). Thus, the H<sub>2</sub> cycling model for energy conservation remains  
91 unproven.

92 Based on series of genetic experiments, we proposed that the methanogenic  
93 archaeon, *Methanosarcina barkeri*, employs H<sub>2</sub> cycling during growth on one-carbon (C-  
94 1) substrates and acetate (16, 17). During growth on C-1 compounds such as methanol,  
95 the putative cycling pathway would produce H<sub>2</sub> using the cytoplasmic F420-dependent  
96 (Frh) and energy-converting ferredoxin-dependent (Ech) hydrogenases, while H<sub>2</sub>  
97 production during growth on acetate would be mediated solely by Ech. Both pathways  
98 would converge on the methanophenazine-dependent hydrogenase (Vht), which is  
99 thought to have an active site on the outer face of the cell membrane (18), to consume  
100 extracellular H<sub>2</sub> and deliver electrons to the membrane-bound electron transport chain,  
101 where they serve to reduce the coenzyme M-coenzyme B heterodisulfide (CoM-S-S-  
102 CoB) produced during the production of methane (Fig 1). However, these genetic  
103 studies remain incomplete because neither the role of Vht, nor the production and  
104 consumption of hydrogen were examined. Here we explicitly test both, providing strong  
105 experimental support for the role of H<sub>2</sub> cycling in energy conservation in *M. barkeri*.

106

## 107 **Results and Discussion**

108 **Hydrogenases of *M. barkeri*.** Three distinct types of hydrogenases are encoded  
109 by *M. barkeri* Fusaro (Fig. S1) (19). The F420-reducing hydrogenase (Frh) is a  
110 cytoplasmic, 3-subunit ( $\alpha$ ,  $\beta$ , and  $\gamma$ ) enzyme encoded by the *frhADGB* operon, which

111 also includes a maturation protease, FrhD (20). This enzyme couples the  
112 oxidation/reduction of the deazaflavin cofactor F420 with production/consumption of H<sub>2</sub>.  
113 The membrane-bound Vht hydrogenase utilizes the quinone-like electron carrier,  
114 methanophenazine, as a cofactor (21). Like Frh, Vht is a 3-subunit enzyme encoded by  
115 a four-gene operon (*vhtGACD*) that includes a maturation protease, VhtD (19). *M.*  
116 *barkeri* also encodes homologs of both the *frh* and *vht* operons (the *freAEGB* and  
117 *vhxGAC* operons, respectively); however, multiple lines of evidence suggest these  
118 genes are incapable of producing active hydrogenases (16, 22). Thus, the presence of  
119 these genes has no bearing on the results presented herein. The final hydrogenase  
120 encoded by *M. barkeri* is a membrane-bound, energy-converting hydrogenase (Ech),  
121 which couples the oxidation/reduction of ferredoxin and H<sub>2</sub> to the  
122 production/consumption of a proton motive force (23, 24). Thus, the enzyme can use  
123 proton motive force to drive the endergonic reduction of ferredoxin by H<sub>2</sub>, which is  
124 required for CO<sub>2</sub> reduction during hydrogenotrophic methanogenesis and for  
125 biosynthesis during growth by H<sub>2</sub>-dependent reduction of C-1 compounds (methyl-  
126 reducing methanogenesis). During both methylotrophic and aceticlastic  
127 methanogenesis, Ech is believed to couple oxidation of reduced ferredoxin to  
128 production of proton motive force and H<sub>2</sub>. The hydrogen thus produced would need to  
129 be recaptured by Vht in a putative H<sub>2</sub> cycling process that contributes to proton motive  
130 force (Fig 1) (17).

131 **The cytoplasmic Frh hydrogenase is responsible for production of H<sub>2</sub>**  
132 **during growth on methanol.** A number of studies have shown that assorted  
133 *Methanosarcina* strains produce H<sub>2</sub> during growth on methylotrophic and aceticlastic

134 substrates (9, 25-30); however, to our knowledge this has never been assessed in *M.*  
135 *barkeri* strain Fusaro. To test this, we quantified the accumulation of CH<sub>4</sub> and H<sub>2</sub> during  
136 growth on methanol medium (Fig 2). Consistent with the hydrogen-cycling hypothesis,  
137 we observed significant H<sub>2</sub> production, which reached a maximum partial pressure of  
138 ca. 20 Pa near the end of exponential growth. As expected, the culture also produced  
139 substantial levels of methane. As previously observed (16), a mutant lacking Frh  
140 (WWM115, Table S1) grew at a slower rate than its isogenic parent, and produced  
141 somewhat smaller amounts of methane. Very little H<sub>2</sub> (< 4 Pa) was produced during  
142 growth of the  $\Delta frh$  mutant; however, after growth ceased, the H<sub>2</sub> concentration slowly  
143 rose, reaching a maximum level of 7 Pa. Thus, Frh is responsible for most hydrogen  
144 production during growth of *M. barkeri* Fusaro on methanol, although, some hydrogen is  
145 still produced in the  $\Delta frh$  mutant. As will be shown below, Ech is probably responsible  
146 for the low levels of H<sub>2</sub> seen in the  $\Delta frh$  mutant.

147 **Vht activity is required for viability of *M. barkeri*.** To investigate the role of Vht  
148 during growth of *M. barkeri*, we attempted to delete the *vhtGACD* operon via  
149 homologous gene replacement (31, 32). However, despite numerous attempts,  
150 including selection on a variety of media, with and without supplementation of potential  
151 biosynthetic intermediates, no mutant colonies were obtained. We also attempted to  
152 delete the *vht* operon using the markerless deletion method of genetic exchange (33).  
153 This method relies on construction of a merodiploid strain with both mutant and wild  
154 type alleles. Upon segregation of the merodiploid, 50% of the recombinants are  
155 expected to be mutants if there is no selective pressure against the mutant allele.  
156 However, if the mutation causes a reduction in growth rate (with lethality being the most

157 extreme case), the probability of obtaining recombinants with the mutant allele is  
158 severely reduced. We tested 101 haploid recombinants obtained from a  
159 *vhtGACD*<sup>+</sup>/ $\Delta$ *vhtGACD* merodiploid; all carried the wild-type *vht* allele. Taken together,  
160 these data suggest that the *vhtGACD* operon is critical for normal growth of *M. barkeri*.

161 To test whether Vht is essential, we constructed a mutant in which the *vht* operon  
162 was placed under control of a tightly regulated, tetracycline-dependent promoter (34).  
163 We then examined the viability of the mutant and its isogenic parent by spotting serial  
164 dilutions on a variety of media, with and without tetracycline. As shown in Figure 3, the  
165 *P<sub>tet</sub>::vht* mutant is unable to grow in the absence of the inducer, but grew well when  
166 tetracycline was added, whereas the isogenic parent grew with or without the addition of  
167 tetracycline. These phenotypes were observed on a variety of media including (i)  
168 methanol, (ii) methanol plus H<sub>2</sub>, (iii) H<sub>2</sub>/CO<sub>2</sub>, and (iv) acetate, which were chosen  
169 because they encompass growth conditions that require each of the four known  
170 methanogenic pathways used by *M. barkeri* (Fig 4). It should be stressed that the  
171 *P<sub>tet</sub>::vht* mutant used in this experiment was pre-grown in the presence of inducer. Thus,  
172 at the start of the experiment, all cells have active Vht. However, during cultivation in the  
173 absence of tetracycline, pre-existing Vht is depleted by protein turnover and cell  
174 division, thereby allowing characterization of the Vht-deficient phenotype. The absence  
175 of growth of the diluted cultures in all media shows that Vht is essential for growth via  
176 the methylotrophic (methanol), methyl-reducing (methanol plus H<sub>2</sub>), hydrogenotrophic  
177 (H<sub>2</sub>/CO<sub>2</sub>) and aceticlastic (acetate) methanogenic pathways.

178 **Depletion of Vht results in H<sub>2</sub> accumulation and cell lysis.** To help  
179 understand why Vht is essential, we quantified production of H<sub>2</sub> and CH<sub>4</sub> in cultures of



180 the  $P_{tet}::vht$  strain with and without tetracycline (Fig 2). When grown in methanol  
181 medium in the presence of tetracycline, the accumulation of H<sub>2</sub> and CH<sub>4</sub> was essentially  
182 identical to that of the isogenic parent. Cultures in which *vht* is not expressed (*i.e.*  
183 without tetracycline) grew initially, but rapidly slowed, and reached an optical density  
184 that was less than half of that obtained when *vht* was expressed. The optical density  
185 subsequently dropped, suggesting cell death and lysis. Similarly, methane accumulation  
186 in cultures not expressing *vht* was much slower than in induced cultures, and only  
187 reached half of that seen under inducing conditions. In contrast, H<sub>2</sub> accumulation was  
188 much higher in the absence of Vht, with final levels nearly six-fold higher than those  
189 seen in cultures that express Vht. These data clearly show that Vht is required for  
190 efficient recapture of H<sub>2</sub> produced by Frh and Ech. Moreover, they suggest that H<sub>2</sub> loss  
191 is responsible for the lethal consequences of *vht* repression.

192 **Vht is not essential in  $\Delta frh$  mutants.** If the inability to recapture H<sub>2</sub> is  
193 responsible for the essentiality of Vht, then it should be possible to delete the *vht* operon  
194 in strains that do not produce hydrogen. As described above, Frh is responsible for the  
195 majority of H<sub>2</sub> production during growth. Thus, we attempted to introduce a  $\Delta vht$  allele  
196 into the  $\Delta frh$  host. In contrast to our prior unsuccessful attempts to create a  $\Delta vht$  single  
197 mutant, the  $\Delta vht/\Delta frh$  double mutant was isolated in the first attempt. Therefore, Vht is  
198 not required when Frh is absent. Like the  $\Delta frh$  single mutant, the  $\Delta vht/\Delta frh$  double  
199 mutant grows slowly on methanol and produces lower levels of methane (Fig 2).  
200 Significantly, the double mutant does not produce the excessive level of H<sub>2</sub> seen in the  
201 uninduced  $P_{tet}::vht$  strain, instead accumulating H<sub>2</sub> at levels similar to those of the  
202 parental strain (*ca.* 20 Pa). Because Ech is the only active hydrogenase remaining in

203 the  $\Delta vht/\Delta frh$  mutant, it must be responsible for H<sub>2</sub> production in this strain. This begs  
204 the question of why H<sub>2</sub> accumulation stops at 20 Pa in the double mutant, while the  
205 uninduced P<sub>tet::vht</sub> strain produces much higher levels. We suggest that the coupling of  
206 Ech activity to generation of proton motive force thermodynamically restrains excessive  
207 H<sub>2</sub> production, even in the absence of H<sub>2</sub> uptake by Vht. This would also explain the  
208 viability of the  $\Delta vht/\Delta frh$  double mutant. This situation is in stark contrast to that seen in  
209 the *vht*-depleted strain, where the F420-dependent Frh is responsible for most of the H<sub>2</sub>  
210 production (see above). Accordingly, at the low H<sub>2</sub> partial pressures observed in our  
211 experiments, reduction of protons with F420 is strongly exergonic, allowing excessive  
212 hydrogen accumulation. This is also consistent with the observation that the redox state  
213 of F420 is in rapid equilibrium with H<sub>2</sub> (35). Interestingly, the lower amount of H<sub>2</sub>  
214 accumulation in the  $\Delta frh$  mutant, relative to that seen in the  $\Delta vht/\Delta frh$  mutant, shows that  
215 Vht also consumes H<sub>2</sub> produced by Ech. This supports previous studies indicating  
216 potential energy conservation via Ech/Vht H<sub>2</sub> cycling during acetate metabolism (17,  
217 23).

218 ***M. barkeri* has a bifurcated electron transport chain with H<sub>2</sub>-dependent and**  
219 **-independent branches.** We previously showed that *M. barkeri* has a branched  
220 electron transport chain, with Frh- and F420 dehydrogenase (Fpo)-dependent branches  
221 (16). The data reported here extend our understanding of the Frh-dependent branch,  
222 and are fully consistent with the model depicted in Fig 1. Thus, during growth on  
223 methylotrophic substrates such as methanol, reduced F420 is preferentially oxidized via  
224 an energy conserving, H<sub>2</sub> cycling electron transport chain that requires Frh. However, in  
225 the absence of Frh, reduced F420 is channeled into the Fpo-dependent electron

226 transport chain, which supports growth at a significantly slower rate (Figs 2 & 4). This  
227 alternate pathway accounts for the viability of the  $\Delta frh$  mutant, which is lost when both  
228 *frh* and *fpo* are deleted (16). Similar, but less severe phenotypes have been observed in  
229 *fpo* and *frh* mutants of *Methanosarcina mazei*, thus it seems likely that H<sub>2</sub> cycling also  
230 occurs in this closely-related species (36). However, many *Methanosarcina* species,  
231 especially those that inhabit marine environments, are devoid of hydrogenase activity,  
232 despite the presence of hydrogenase encoding genes. We, and others, have interpreted  
233 this to be an adaptation to the marine environment, where H<sub>2</sub>-utilizing sulfate reducers  
234 are likely to disrupt H<sub>2</sub> cycling due to the superior thermodynamics of H<sub>2</sub> oxidation  
235 coupled to sulfate reduction (19, 37).

236 A similar branched electron transport chain may also explain the contradictory  
237 evidence regarding H<sub>2</sub> cycling in *Desulfovibrio* species. Thus, the viability of  
238 *Desulfovibrio* hydrogenase mutants and the inability of excess H<sub>2</sub> to suppress substrate  
239 catabolism can both be explained by the presence of alternative electron transport  
240 mechanisms. Indeed, metabolic modeling of *D. vulgaris* strongly supports this  
241 interpretation (13). Thus, it is critical that experiments designed to test the H<sub>2</sub> cycling  
242 mechanism be interpreted within a framework that includes the possibility of branched  
243 electron transport chains. With this in mind, it seems likely that many anaerobic  
244 organisms might use H<sub>2</sub> cycling for energy conservation. Indeed, since it was originally  
245 proposed, H<sub>2</sub> cycling has been suggested to occur in the acetogen *Acetobacterium*  
246 *woodii* (10) and in the Fe (III) respiring *Geobacter sulfurreducens* (8).

247 **Why are Vht mutants inviable during growth on methanol/H<sub>2</sub> or H<sub>2</sub>/CO<sub>2</sub>?**

248 Although the data presented here strongly support the H<sub>2</sub> cycling model, they raise

249 additional questions regarding H<sub>2</sub>-dependent methanogenesis that are not easily  
250 explained. In particular, it is not readily apparent why the uninduced P<sub>tet</sub>::*vht* mutants are  
251 inviable during hydrogenotrophic or methyl-reducing growth. As shown in Figure 4, it  
252 should be possible to channel electrons from H<sub>2</sub> oxidation into the electron transport  
253 chain via Frh and Fpo. Indeed, Thauer *et al* have proposed that this alternate pathway  
254 is functional in *Methanosarcina* (38). Nevertheless, the P<sub>tet</sub>::*vht* mutant does not grow  
255 under repressing conditions on either H<sub>2</sub>/CO<sub>2</sub> or methanol plus H<sub>2</sub>. It should be  
256 stressed, that we use high concentrations of hydrogen during growth on these  
257 substrates. Thus, it is expected that reduction of F420 via Frh should be exergonic in  
258 our experiments, which would favor this pathway. (This is in contrast to the  
259 methylotrophic or acetoclastic growth conditions described above, under which the  
260 reverse reaction (*i.e.* hydrogen production) is favored.) Thus, a thermodynamic  
261 argument cannot easily explain the results. Further, based on available evidence (16,  
262 39, 40), energy conservation via the Vht-dependent pathway should be identical to that  
263 of the alternate Frh/Fpo-dependent pathway. Thus, an energy conservation argument  
264 also cannot explain the phenomenon. One might argue that faster kinetics of the Vht-  
265 dependent pathway could be responsible, but, in our opinion, the growth (albeit slower  
266 than wild-type) of the  $\Delta frh$  and  $\Delta vht/\Delta frh$  mutants during methylotrophic growth, which  
267 depends on Fpo, argues against this explanation. Therefore, as yet unknown regulatory  
268 and/or biochemical constraints on hydrogen metabolism in *Methanosarcina* await  
269 discovery.

270

271 **Materials and Methods**

272           **Strains, media, and growth conditions.** The construction and genotypes of all  
273 *Methanosarcina* strains are presented in Table S1. *Methanosarcina* strains were grown  
274 as single cells (41) at 37 °C in high salt (HS) broth medium (42) or on agar-solidified  
275 medium as described (43). Growth substrates provided were methanol (125 mM in  
276 broth medium and 50 mM in agar-solidified medium) or sodium acetate (120 mM) under  
277 a headspace of either N<sub>2</sub>/CO<sub>2</sub> (80/20%) at 50 kPa over ambient pressure or H<sub>2</sub>/CO<sub>2</sub>  
278 (80/20%) at 300 kPa over ambient pressure. Cultures were supplemented as indicated  
279 with 0.1% yeast extract, 0.1% casamino acids, 10 mM sodium acetate or 10 mM  
280 pyruvate. Puromycin (CalBioChem, San Diego, CA) was added at 2 µg/ml for selection  
281 of the puromycin transacetylase (*pac*) gene (33). 8-aza-2,6-diaminopurine (8-ADP)  
282 (Sigma, St Louis, MO) was added at 20 µg/ml for selection against the presence of *hpt*  
283 (33). Tetracycline was added at 100 µg/ml to induce the tetracycline-regulated  
284 *PmcrB(tetO3)* promoter (34). Standard conditions were used for growth of *Escherichia*  
285 *coli* strains (44) DH5α/λ-*pir* (45) and DH10B (Stratagene, La Jolla, CA), which were  
286 used as hosts for plasmid constructions.

287           **DNA methods and plasmid construction.** Standard methods were used for  
288 plasmid DNA isolation and manipulation using *E. coli* hosts (46). Liposome mediated  
289 transformation was used for *Methanosarcina* as described (47). Genomic DNA isolation  
290 and DNA hybridization were as described (32, 42, 43). DNA sequences were  
291 determined from double-stranded templates by the W.M. Keck Center for Comparative  
292 and Functional Genomics, University of Illinois. Plasmid constructions are described in  
293 the supporting information (Tables S2 & S3).

294           **Construction of the  $\Delta frh$  and  $\Delta vht/\Delta frh$  mutants.** The markerless genetic  
295 exchange method (33) using plasmid pGK4 was employed to delete *frhADGB* ( $\Delta frh$ ) in  
296 the  $\Delta hpt$  background of *M. barkeri* Fusaro (Tables S1, S2, & S3) using methanol/H<sub>2</sub>/CO<sub>2</sub>  
297 as the growth substrate. The  $\Delta vht/\Delta frh$  mutant was constructed by deleting *vhtGACD* in  
298 the  $\Delta frh$  markerless mutant by the homologous recombination-mediated gene  
299 replacement method (32). To do this, the 5.6 kb XhoI/NotI fragment of pGK82B was  
300 used to transform the  $\Delta frh$  mutant to puromycin resistance on methanol medium. The  
301 mutants were confirmed by PCR and DNA hybridization (data not shown).

302           **Construction of the tetracycline-regulated *vht* mutant ( $P_{tet}::vht$ ).** The  
303 tetracycline-regulated *PmcrB(tetO3)* promoter was employed to drive conditional  
304 expression of the *vht* operon in *M. barkeri* WWM157 (34). This strain was constructed  
305 by transforming WWM154 to puromycin resistance using the 7 kb NcoI/SpeI fragment of  
306 pGK61A (Tables S1, S2, & S3). The transformants were selected on methanol plus  
307 H<sub>2</sub>/CO<sub>2</sub> medium in the presence of puromycin and tetracycline. The  $P_{tet}::vht$  strain was  
308 confirmed by DNA hybridization (data not shown). To ensure that the native *vht*  
309 promoter ( $Pvht$ ) did not interfere with expression from *PmcrB(tetO3)*, 382 bp upstream  
310 of *vhtG* were deleted in  $P_{tet}::vht$ . This left 1038 bp intact for the expression of the *hyp*  
311 operon, which is upstream of the *vht* operon and expressed in the opposite direction.

312           **Determination of Vht essentiality during growth on all substrate-types.**  
313 Growth of WWM157 ( $P_{tet}::vht$ ) and WWM154 (isogenic parent) on methanol,  
314 methanol/H<sub>2</sub>/CO<sub>2</sub>, H<sub>2</sub>/CO<sub>2</sub>, and acetate were analyzed by the spot-plate method (48).  
315 Cultures were first adapted for at least 15 generations to the substrate of interest;  
316 tetracycline was added to each medium for growth of WWM157. Upon reaching

317 stationary phase, 10 ml of culture was washed three times and re-suspended in 5 ml HS  
318 medium that lacked growth substrate. Subsequently, 10  $\mu$ l of 10-fold serial dilutions was  
319 spotted onto the following: 3 layers of GB004 paper (Whatman, NJ), 2 layers of GB002  
320 paper (Schleicher & Schuell BioScience, NH), 1 layer of 3MM paper (Whatman, NJ),  
321 and a 0.22 mM nylon membrane (GE Water and Process Technologies, PA) soaked in  
322 43 ml of HS-medium containing the substrate of interest with and without Tc. Plates  
323 were sealed and incubated at 37 °C for at least two weeks in an intrachamber anoxic  
324 incubator (49). Growth on acetate and methanol was tested under an atmosphere of  
325 N<sub>2</sub>/CO<sub>2</sub>/H<sub>2</sub>S (80/19.9/0.1 ratio), while growth on methanol/H<sub>2</sub>/CO<sub>2</sub> or H<sub>2</sub>/CO<sub>2</sub> was tested  
326 under an atmosphere of H<sub>2</sub>/CO<sub>2</sub>/H<sub>2</sub>S (80/19.9/0.1 ratio).

327 **Measurement of H<sub>2</sub>, CH<sub>4</sub> and OD<sub>600</sub> during growth on methanol. *M. barkeri***  
328 WWM85 (isogenic parent), WWM157 (*P<sub>tet::vht</sub>*; grown in presence of Tc), WWM115  
329 ( $\Delta$ *frh*) and WWM351 ( $\Delta$ *vht*/ $\Delta$ *frh*) were grown on methanol until mid-exponential phase  
330 (OD<sub>600</sub> c. 0.5) and then 1 ml (WWM85 and WWM157) or 5ml (WWM115 and WWM351)  
331 were inoculated into 100 ml HS-methanol in a 500 ml serum bottle. For WWM157, the  
332 culture was washed once prior to inoculation with or without tetracycline. To measure H<sub>2</sub>  
333 and CH<sub>4</sub>, ca. 1 ml or 2 ml headspace sample was withdrawn aseptically from the culture  
334 at various time points with a syringe that had been flushed with sterile, anaerobic N<sub>2</sub>.  
335 The gas sample was then diluted into 70 ml helium. A gas-tight syringe flushed with  
336 helium was subsequently used to withdraw 3 ml of the diluted sample, which was then  
337 injected into an SRI gas chromatograph, equipped with a reduction gas detector (RGD)  
338 and a thermal conductivity detector (TCD) at 52°C. The RGD column was a three-foot  
339 long 13X molecule sieve, whereas the TCD column was a six-foot HayeSep D. RGD

340 was used to detect H<sub>2</sub> by peak height and TCD for CH<sub>4</sub> by peak area. Helium was used  
341 as the carrier gas. OD<sub>600</sub> was also measured during the growth curve.

342

### 343 **Acknowledgements**

344 We wish to thank Rob Sanford for providing assistance and facilities for measurement  
345 of low hydrogen partial pressures. The authors acknowledge the Division of Chemical  
346 Sciences, Geosciences, and Biosciences, Office of Basic Energy Sciences of the U.S.  
347 Department of Energy through Grant DE-FG02-02ER15296 for funding of this work.



348 **References**

- 349 1. White D. 2000. Electron Transport, p 103-131, *The Physiology and Biochemistry*  
350 of Prokaryotes, 2nd ed. Oxford University Press, New York.
- 351 2. White D. 2000. Bioenergetics in the Cytosol, p 165-179, *The Physiology and*  
352 *Biochemistry of Prokaryotes*, 2nd ed. Oxford University Press, New York.
- 353 3. Gottschalk G, Thauer RK. 2001. The Na<sup>+</sup>-translocating methyltransferase  
354 complex from methanogenic archaea. *Biochim Biophys Acta* 1505:28-36.
- 355 4. Anantharam V, Allison MJ, Maloney PC. 1989. Oxalate:formate exchange. The  
356 basis for energy coupling in *Oxalobacter*. *J Biol Chem* 264:7244-7250.
- 357 5. Kuhner CH, Hartman PA, Allison MJ. 1996. Generation of a proton motive force  
358 by the anaerobic oxalate-degrading bacterium *Oxalobacter formigenes*. *Appl*  
359 *Environ Microbiol* 62:2494-2500.
- 360 6. Béjà O, Aravind L, Koonin EV, Suzuki MT, Hadd A, Nguyen LP, Jovanovich SB,  
361 Gates CM, Feldman RA, Spudich JL, Spudich EN, DeLong EF. 2000. Bacterial  
362 rhodopsin: evidence for a new type of phototrophy in the sea. *Science* 289:1902-  
363 1906.
- 364 7. Odom JM, Peck HD. 1981. Hydrogen cycling as a general mechanism for energy  
365 coupling in the sulfate-reducing bacteria, *Desulfovibrio* sp. *FEMS Microbiol Lett*  
366 12:47-50.
- 367 8. Coppi MV. 2005. The hydrogenases of *Geobacter sulfurreducens*: a comparative  
368 genomic perspective. *Microbiology* 151:1239-1254.
- 369 9. Lovley DR, Ferry JG. 1985. Production and Consumption of H<sub>2</sub> during Growth of  
370 *Methanosarcina* spp. on Acetate. *Appl Environ Microbiol* 49:247-249.

- 371 10. Odom JM, Peck HD. 1984. Hydrogenase, electron-transfer proteins, and energy  
372 coupling in the sulfate-reducing bacteria *Desulfovibrio*. *Annu Rev Microbiol*  
373 38:551-592.
- 374 11. Lupa B, Hendrickson EL, Leigh JA, Whitman WB. 2008. Formate-dependent H<sub>2</sub>  
375 production by the mesophilic methanogen *Methanococcus maripaludis*. *Appl*  
376 *Environ Microbiol* 74:6584-6590.
- 377 12. Peck HD, Jr. , LeGall J, Lespinat PA, Berlier Y, Fauque G. 1987. A direct  
378 demonstration of hydrogen cycling by *Desulfovibrio vulgaris* employing  
379 membrane-inlet mass spectrometry. *FEMS Microbiol Lett* 40:295-299.
- 380 13. Noguera DR, Brusseau GA, Rittmann BE, Stahl DA. 1998. A unified model  
381 describing the role of hydrogen in the growth of *Desulfovibrio vulgaris* under  
382 different environmental conditions. *Biotechnol Bioeng* 59:732-746.
- 383 14. Odom JM, Wall JD. 1987. Properties of a hydrogen-inhibited mutant of  
384 *Desulfovibrio desulfuricans* ATCC 27774. *J Bacteriol* 169:1335-1337.
- 385 15. Pankhania IP, Gow LA, Hamilton WA. 1986. The Effect of Hydrogen on the  
386 Growth of *Desulfovibrio vulgaris* (Hildenborough) on Lactate. *Journal of General*  
387 *Microbiology* 132:3349-3356.
- 388 16. Kulkarni G, Kridelbaugh DM, Guss AM, Metcalf WW. 2009. Hydrogen is a  
389 preferred intermediate in the energy-conserving electron transport chain of  
390 *Methanosarcina barkeri*. *Proc Natl Acad Sci U S A* 106:15915-15920.
- 391 17. Meuer J, Kuettner HC, Zhang JK, Hedderich R, Metcalf WW. 2002. Genetic  
392 analysis of the archaeon *Methanosarcina barkeri* Fusaro reveals a central role for

- 393 Ech hydrogenase and ferredoxin in methanogenesis and carbon fixation. Proc  
394 Natl Acad Sci U S A 99:5632-5637.
- 395 18. Deppenmeier U, Blaut M, Lentjes S, Herzberg C, Gottschalk G. 1995. Analysis of  
396 the *vhoGAC* and *vhtGAC* operons from *Methanosarcina mazei* strain Gö1, both  
397 encoding a membrane-bound hydrogenase and a cytochrome *b*. Eur J Biochem  
398 227:261-269.
- 399 19. Guss AM, Kulkarni G, Metcalf WW. 2009. Differences in hydrogenase gene  
400 expression between *Methanosarcina acetivorans* and *Methanosarcina barkeri*. J  
401 Bacteriol 191:2826-2833.
- 402 20. Vaupel M, Thauer RK. 1998. Two F<sub>420</sub>-reducing hydrogenases in  
403 *Methanosarcina barkeri*. Arch Microbiol 169:201-205.
- 404 21. Brodersen J, Bäumer S, Abken HJ, Gottschalk G, Deppenmeier U. 1999.  
405 Inhibition of membrane-bound electron transport of the methanogenic archaeon  
406 *Methanosarcina mazei* Gö1 by diphenyliodonium. Eur J Biochem 259:218-  
407 224.
- 408 22. Mand TD, Kulkarni G, Metcalf WW. 2018. Genetic, biochemical, and molecular  
409 characterization of *Methanosarcina barkeri* mutants lacking three distinct classes  
410 of hydrogenase. bioRxiv doi: <https://doi.org/10.1101/334656>
- 411 23. Meuer J, Bartoschek S, Koch J, Künkel A, Hedderich R. 1999. Purification and  
412 catalytic properties of Ech hydrogenase from *Methanosarcina barkeri*. Eur J  
413 Biochem 265:325-335.

- 414 24. Peters JW, Schut GJ, Boyd ES, Mulder DW, Shepard EM, Broderick JB, King  
415 PW, Adams MWW. 2015. [FeFe]- and [NiFe]-hydrogenase diversity, mechanism,  
416 and maturation. *Biochim Biophys Acta* 1853:1350-1369.
- 417 25. Phelps TJ, Conrad R, Zeikus JG. 1985. Sulfate-Dependent Interspecies H<sub>2</sub>  
418 Transfer between *Methanosarcina barkeri* and *Desulfovibrio vulgaris* during  
419 Coculture Metabolism of Acetate or Methanol. *Appl Environ Microbiol* 50:589-  
420 594.
- 421 26. Bhatnagar L, Krzycki JA, Zeikus JG. 1987. Analysis of hydrogen metabolism in  
422 *Methanosarcina barkeri*: Regulation of hydrogenase and role of CO-  
423 dehydrogenase in H<sub>2</sub> production. *FEMS Microbiol Lett* 41:337-343.
- 424 27. Boone DR, Menaia JAGF, Boone JE, Mah RA. 1987. Effects of Hydrogen  
425 Pressure during Growth and Effects of Pregrowth with Hydrogen on Acetate  
426 Degradation by *Methanosarcina* Species. *Appl Environ Microbiol* 53:83-87.
- 427 28. Krzycki JA, Morgan JB, Conrad R, Zeikus JG. 1987. Hydrogen metabolism  
428 during methanogenesis from acetate by *Methanosarcina barkeri*. *FEMS Microbiol*  
429 *Lett* 40:193-198.
- 430 29. Ahring BK, Westermann P, Mah RA. 1991. Hydrogen inhibition of acetate  
431 metabolism and kinetics of hydrogen consumption by *Methanosarcina*  
432 *thermophila* TM-1. *Arch Microbiol* 157:38-42.
- 433 30. Zinder SH, Anguish T. 1992. Carbon Monoxide, Hydrogen, and Formate  
434 Metabolism during Methanogenesis from Acetate by Thermophilic Cultures of  
435 *Methanosarcina* and *Methanotherix* Strains. *Appl Environ Microbiol* 58:3323-3329.

- 436 31. Maeder DL, Anderson I, Brettin TS, Bruce DC, Gilna P, Han CS, Lapidus A,  
437 Metcalf WW, Saunders E, Tapia R, Sowers KR. 2006. The *Methanosarcina*  
438 *barkeri* genome: comparative analysis with *Methanosarcina acetivorans* and  
439 *Methanosarcina mazei* reveals extensive rearrangement within methanosarcinal  
440 genomes. J Bacteriol 188:7922-7931.
- 441 32. Zhang JK, White AK, Kuettner HC, Boccazzi P, Metcalf WW. 2002. Directed  
442 mutagenesis and plasmid-based complementation in the methanogenic  
443 archaeon *Methanosarcina acetivorans* C2A demonstrated by genetic analysis of  
444 proline biosynthesis. J Bacteriol 184:1449-1454.
- 445 33. Pritchett MA, Zhang JK, Metcalf WW. 2004. Development of a markerless  
446 genetic exchange method for *Methanosarcina acetivorans* C2A and its use in  
447 construction of new genetic tools for methanogenic archaea. Appl Environ  
448 Microbiol 70:1425-1433.
- 449 34. Guss AM, Rother M, Zhang JK, Kulkarni G, Metcalf WW. 2008. New methods for  
450 tightly regulated gene expression and highly efficient chromosomal integration of  
451 cloned genes for *Methanosarcina* species. Archaea 2:193-203.
- 452 35. de Poorter LM, Geerts WJ, Keltjens JT. 2005. Hydrogen concentrations in  
453 methane-forming cells probed by the ratios of reduced and oxidized coenzyme  
454 F<sub>420</sub>. Microbiology 151:1697-1705.
- 455 36. Welte C, Deppenmeier U. 2011. Re-evaluation of the function of the F<sub>420</sub>  
456 dehydrogenase in electron transport of *Methanosarcina mazei*. FEBS J  
457 278:1277-1287.

- 458 37. Deppenmeier U. 2004. The membrane-bound electron transport system of  
459 *Methanosarcina* species. J Bioenerg Biomembr 36:55-64.
- 460 38. Thauer RK, Kaster A-K, Seedorf H, Buckel W, Hedderich R. 2008. Methanogenic  
461 archaea: ecologically relevant differences in energy conservation. Nat Rev  
462 Microbiol 6:579-591.
- 463 39. Ide T, Baumer S, Deppenmeier U. 1999. Energy conservation by the  
464 H<sub>2</sub>:heterodisulfide oxidoreductase from *Methanosarcina mazei* Gö1: identification  
465 of two proton-translocating segments. J Bacteriol 181:4076-4080.
- 466 40. Baumer S, Ide T, Jacobi C, Johann A, Gottschalk G, Deppenmeier U. 2000. The  
467 F<sub>420</sub>H<sub>2</sub> dehydrogenase from *Methanosarcina mazei* is a Redox-driven proton  
468 pump closely related to NADH dehydrogenases. J Biol Chem 275:17968-17973.
- 469 41. Sowers KR, Boone JE, Gunsalus RP. 1993. Disaggregation of *Methanosarcina*  
470 spp. and Growth as Single Cells at Elevated Osmolarity. Appl Environ Microbiol  
471 59:3832-3839.
- 472 42. Metcalf WW, Zhang JK, Shi X, Wolfe RS. 1996. Molecular, genetic, and  
473 biochemical characterization of the *serC* gene of *Methanosarcina barkeri* Fusaro.  
474 J Bacteriol 178:5797-5802.
- 475 43. Boccazzi P, Zhang JK, Metcalf WW. 2000. Generation of dominant selectable  
476 markers for resistance to pseudomonic acid by cloning and mutagenesis of the  
477 *ileS* gene from the archaeon *Methanosarcina barkeri* Fusaro. J Bacteriol  
478 182:2611-2618.
- 479 44. Wanner BL. 1986. Novel regulatory mutants of the phosphate regulon in  
480 *Escherichia coli* K-12. J Mol Biol 191:39-58.

- 481 45. Miller VL, Mekalanos JJ. 1988. A novel suicide vector and its use in construction  
482 of insertion mutations: osmoregulation of outer membrane proteins and virulence  
483 determinants in *Vibrio cholerae* requires *toxR*. J Bacteriol 170:2575-2583.
- 484 46. Ausubel FM, Brent R, Kingston RE, Moore DD, Seidman JG, Smith JA, Struhl K.  
485 1992. Current Protocols in Molecular Biology. Wiley & Sons, New York.
- 486 47. Metcalf WW, Zhang JK, Apolinario E, Sowers KR, Wolfe RS. 1997. A genetic  
487 system for Archaea of the genus *Methanosarcina*: liposome-mediated  
488 transformation and construction of shuttle vectors. Proc Natl Acad Sci U S A  
489 94:2626-2631.
- 490 48. Buan N, Kulkarni G, Metcalf W. 2011. Genetic methods for *Methanosarcina*  
491 species. Methods Enzymol 494:23-42.
- 492 49. Metcalf WW, Zhang JK, Wolfe RS. 1998. An anaerobic, intrachamber incubator  
493 for growth of *Methanosarcina* spp. on methanol-containing solid media. Appl  
494 Environ Microbiol 64:768-770.
- 495
- 496

497 **Figure Legends**

498 **Figure 1. The putative H<sub>2</sub> cycling electron transport chain of *M. barkeri*.** Growth on  
499 C-1 substrates generates reduced cofactor F420 (F420<sub>red</sub>), which is a hydride carrying  
500 cofactor analogous to NADH, and the reduced form of the small electron-carrying  
501 protein ferredoxin (Fd<sub>red</sub>). During acetoclastic methanogenesis only Fd<sub>red</sub> is produced.  
502 These reduced electron carriers are re-oxidized in the cytoplasm by the Frh and Ech  
503 hydrogenases, respectively, with concomitant consumption of protons to produce  
504 molecular H<sub>2</sub>. H<sub>2</sub> subsequently diffuses out of the cell where it is re-oxidized by the Vht  
505 hydrogenase, which has an active site located on the outer face of the cell membrane.  
506 This reaction releases protons on the outside of the cell and produces reduced  
507 methanophenazine (MPH<sub>2</sub>), a membrane-bound electron carrier analogous to  
508 ubiquinone. MPH<sub>2</sub> subsequently delivers electrons to the enzyme heterodisulfide  
509 reductase (Hdr), which serves as the terminal step in the *Methanosarcina* electron  
510 transport chain. This final reaction regenerates coenzyme B (CoB-SH) and coenzyme M  
511 (CoM-SH) from the mixed disulfide (CoM-S-S-CoB), which is produced from the free  
512 thiol cofactors during methanogenic metabolism. Electron (e<sup>-</sup>) flow and scalar protons  
513 (H<sup>+</sup>) are shown in red. It should be noted that *M. barkeri* can also re-oxidize F420<sub>red</sub>  
514 using the membrane-bound, proton-pumping F420-dehydrogenase (Fpo). Thus, the cell  
515 has a branched electron transport chain and, therefore, is not dependent on H<sub>2</sub> cycling  
516 during growth on methylotrophic substrates (16); however, both pathways for electron  
517 transport from F420 have identical levels of energy conservation: namely 4 H<sup>+</sup>/2e<sup>-</sup>. It  
518 should also be noted that the Ech hydrogenase acts as a proton pump in addition to its  
519 role in H<sub>2</sub> cycling, thus electron transport during acetoclastic methanogenesis conserves



520  $6\text{H}^+/2\text{e}^-$ . Individual subunits of the various enzymes are indicated by letters (e.g. A, B,  
521 C...).

522

523 **Figure 2. Hydrogen and methane production during methylotrophic growth.** The  
524 partial pressures of  $\text{H}_2$  (*panel A*) and methane (*panel B*) were monitored during the  
525 course of growth (as indicated by optical density, *panel C*) in methanol medium for  
526 various *M. barkeri* strains. Strains used were: *M. barkeri* isogenic parental strain (brown  
527 circles, WWM85), tetracycline-regulated *vht* mutant (WWM157) with tetracycline (dark  
528 blue squares) and without tetracycline (light blue squares), *frh* deletion mutant (red  
529 triangles, WWM115), and *frh/vht* double deletion mutant (green diamonds, WWM351).  
530 Measurements were performed in triplicates as described in the methods section.  
531 Complete strain genotypes can be found in Table S1.

532

533 **Figure 3. Essentiality of the Vht hydrogenase in *M. barkeri*.** Cultures of the  $\text{P}_{tet}::vht$   
534 mutant (WWM157) and its isogenic parent (WWM154) were adapted to four different  
535 substrates of interest (and in the presence of tetracycline for  $\text{P}_{tet}::vht$ ), then washed,  
536 serially diluted, and incubated with each substrate with and without tetracycline (Tet).  
537 The media used indicate the ability to grow via each of the four known methanogenic  
538 pathways: (i) methylotrophic (methanol), (ii) methyl-reduction (methanol/ $\text{H}_2/\text{CO}_2$ ), (iii)  
539 hydrogenotrophic ( $\text{H}_2/\text{CO}_2$ ), and (iv) acetoclastic (acetate).

540

541 **Figure 4. The role of  $\text{H}_2$  cycling in the four methanogenic pathways of *M. barkeri*.**  
542 *M. barkeri* utilizes four distinct methanogenic pathways to allow growth on a variety of

543 substrates. In the hydrogenotrophic pathway (shown in red), CO<sub>2</sub> is reduced to methane  
544 using electrons derived from H<sub>2</sub>, while in the methyl-reducing pathway (shown in  
545 orange), H<sub>2</sub> is used to reduce C-1 compounds, such as methanol, directly to CH<sub>4</sub>.  
546 During methylotrophic methanogenesis (shown in green), C-1 compounds are  
547 disproportionated to CO<sub>2</sub> and methane, with one molecule of the C-1 compound  
548 oxidized to provide electrons for reduction of three additional molecules to methane.  
549 Finally, in the acetoclastic pathway (shown in blue), acetate is split into a methyl group  
550 and an enzyme-bound carbonyl moiety. The latter is oxidized to CO<sub>2</sub> to provide  
551 electrons required for reduction of methyl group to methane. The steps catalyzed by  
552 Fpo, Frh, Vht, Ech and Hdr proteins are indicated. Steps involving H<sub>2</sub> cycling are shown  
553 as labeled, hyphenated arrows. An alternate, H<sub>2</sub>-independent electron transport  
554 pathway is shown in brown. Experimental data support the function of this alternate  
555 pathway during methylotrophic methanogenesis, but not in hydrogenotrophic or methyl-  
556 reducing methanogenesis (as indicated by the hyphenated brown box). Abbreviations;  
557 Fpo, F420 dehydrogenase; Frh, F420-reducing hydrogenase; Vht, methanophenazine-  
558 dependent hydrogenase; Ech, energy-converting ferredoxin-dependent hydrogenase;  
559 Hdr, heterodisulfide reductase; CoM, coenzyme M; CoB, coenzyme B; CoB-CoM, mixed  
560 disulfide of CoB and CoM; MP/MPH<sub>2</sub>, oxidized and reduced methanophenazine;  
561 F420<sub>ox</sub>/F420<sub>red</sub>, oxidized and reduced cofactor F420; Fd<sub>ox</sub>/Fd<sub>red</sub>, oxidized and reduced  
562 ferredoxin; CHO-MF, formyl-methanofuran; H<sub>4</sub>SPT, tetrahydrosarcinapterin; CHO-  
563 H<sub>4</sub>SPT, formyl-H<sub>4</sub>SPT; CH≡H<sub>4</sub>SPT, methenyl-H<sub>4</sub>SPT; CH<sub>2</sub>=H<sub>4</sub>SPT, methylene-H<sub>4</sub>SPT;  
564 CH<sub>3</sub>-H<sub>4</sub>SPT, methyl-H<sub>4</sub>SPT; CH<sub>3</sub>-CoM, methyl-coenzyme M; CoA, coenzyme A;

565 CH<sub>3</sub>CO-CoA, acetyl-coenzyme A; [CO], enzyme-bound carbonyl moiety; ATP,  
566 adenosine triphosphate.

567

568 **Figure S1. Hydrogenase operons in *Methanosarcina barkeri*.** Three distinct types of  
569 hydrogenase are encoded by *M. barkeri* Fusaro. The *frh* and *fre* operons encode  
570 putative F420-reducing hydrogenases, while the *vht* and *vhx* operons encode putative  
571 methanophenazine-reducing hydrogenases. Genetic and biochemical data show that  
572 neither the *fre* nor the *vhx* operon is capable of producing an active hydrogenase under  
573 any growth condition yet examined (T.D. Mand, G. Kulkarni, and W.W. Metcalf, 2018,  
574 bioRxiv doi: <https://doi.org/10.1101/334656>). The *ech* operon encodes a ferredoxin-  
575 dependent energy-conserving hydrogenase. The locus tags are shown below each  
576 gene, with the prefix “Mbar\_” omitted to save space (indicated by an asterisk) in some  
577 cases.

578

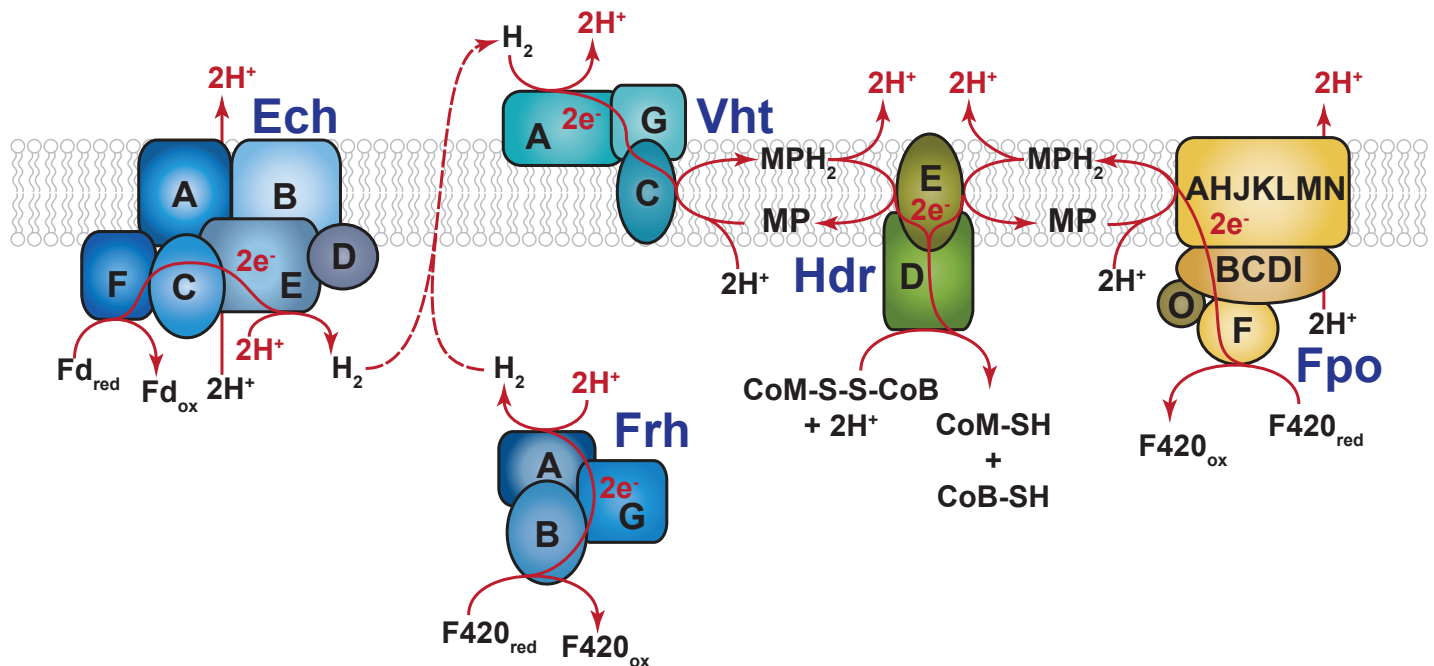

**Figure 1. The putative  $H_2$  cycling electron transport chain of *M. barkeri*.** Growth on C-1 substrates generates reduced cofactor F420 ( $F420_{red}$ ), which is a hydride carrying cofactor analogous to NADH; whereas growth on acetate generates the reduced form of the small electron-carrying protein ferredoxin ( $Fd_{red}$ ). These reduced electron carriers are re-oxidized in the cytoplasm by the Frh and Ech hydrogenases, respectively, with concomitant consumption of protons to produce molecular  $H_2$ .  $H_2$  subsequently diffuses out of the cell where it is re-oxidized by the Vht hydrogenase, which has an active site located on the outer face of the cell membrane. This reaction releases protons on the outside of the cell and produces reduced methanophenazine ( $MPH_2$ ), a membrane-bound electron carrier analogous to ubiquinone.  $MPH_2$  subsequently delivers electrons to the enzyme heterodisulfide reductase (Hdr), which serves as the terminal step in the *Methanosarcina* electron transport chain. This final reaction regenerates coenzyme B (CoB-SH) and coenzyme M (CoM-SH) from the mixed disulfide (CoM-S-S-CoB), which is produced from the free thiol cofactors during methanogenic metabolism. Electron ( $e^-$ ) flow and scalar protons ( $H^+$ ) are shown in red. It should be noted that *M. barkeri* can also re-oxidize  $F420_{red}$  using the membrane-bound, proton-pumping F420-dehydrogenase (Fpo). Thus, the cell has a branched electron transport chain and, therefore, is not dependent on  $H_2$  cycling during growth on methylotrophic substrates (16); however, both pathways for electron transport from F420 have identical levels of energy conservation: namely  $4 H^+/2e^-$ . It should also be noted that the Ech hydrogenase acts as a proton pump in addition to its role in  $H_2$  cycling, thus electron transport during acetoclastic methanogenesis conserves  $6H^+/2e^-$ . Individual subunits of the various enzymes are indicated by letters (e.g. A, B, C...).

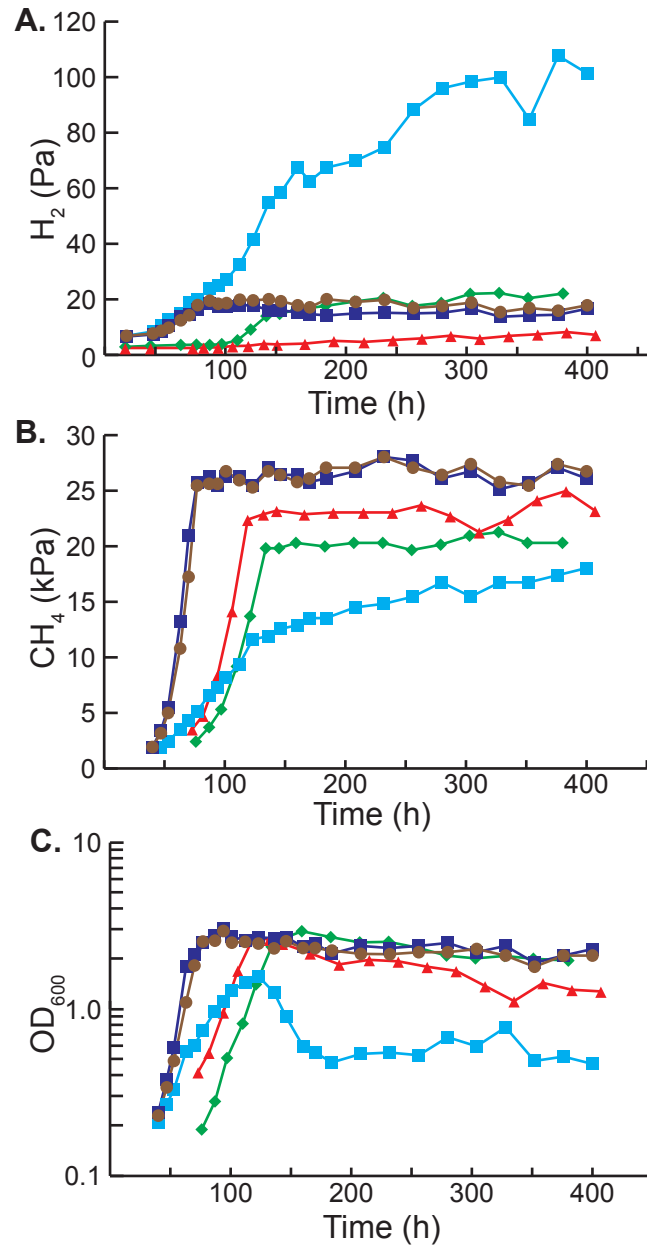

**Figure 2. Hydrogen and methane production during methylotrophic growth.** The partial pressures of H<sub>2</sub> (panel A) and methane (panel B) were monitored during the course of growth (as indicated by optical density, panel C) in methanol medium for various *M. barkeri* strains. Strains used were: *M. barkeri* isogenic parental strain (brown circles, WWM85), tetracycline-regulated *vht* mutant (WWM157) with tetracycline (dark blue squares) and without tetracycline (light blue squares), *frh* deletion mutant (red triangles, WWM115), and *frh/vht* double deletion mutant (green diamonds, WWM351). Measurements were performed in triplicates as described in the methods section. Complete strain genotypes can be found in Table S1.

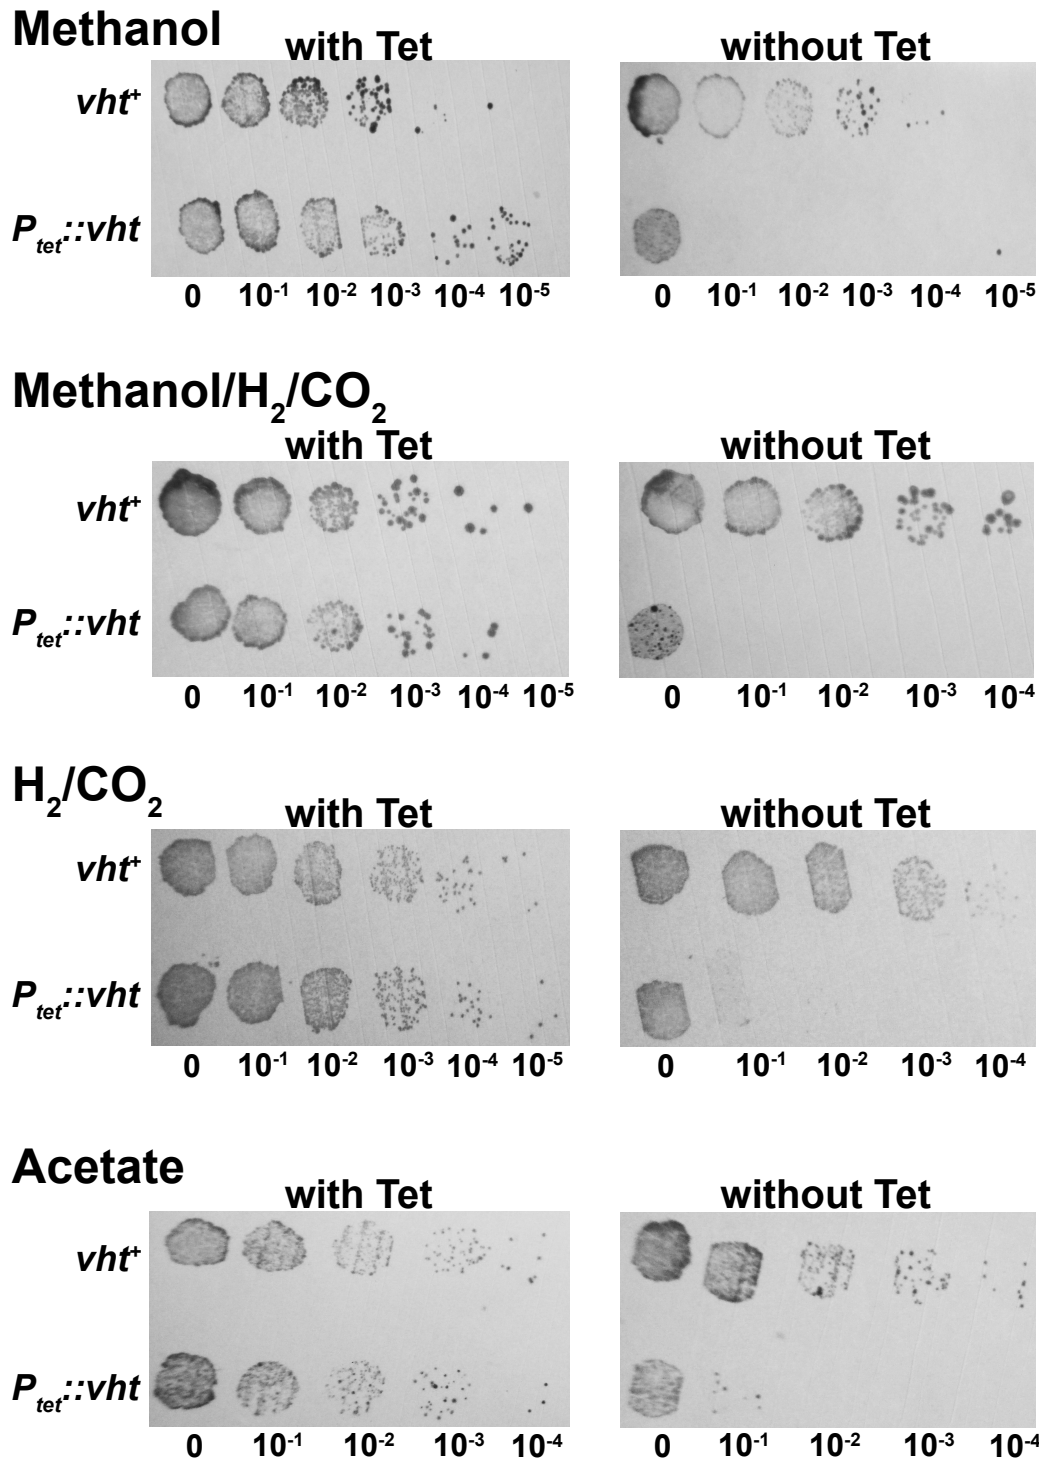

**Figure 3. Essentiality of the Vht hydrogenase in *M. barkeri*.** Cultures of the *P<sub>tet</sub>::vht* mutant (WWM157) and its isogenic parent (WWM154) were adapted to four different substrates of interest (and in the presence of tetracycline for *P<sub>tet</sub>::vht*), then washed, serially diluted, and incubated with each substrate with and without tetracycline (Tc). The media used indicate the ability to grow via each of the four known methanogenic pathways: (i) methylotrophic (methanol), (ii) methyl-reduction (methanol/H<sub>2</sub>/CO<sub>2</sub>), (iii) hydrogenotrophic (H<sub>2</sub>/CO<sub>2</sub>), and (iv) acetate.

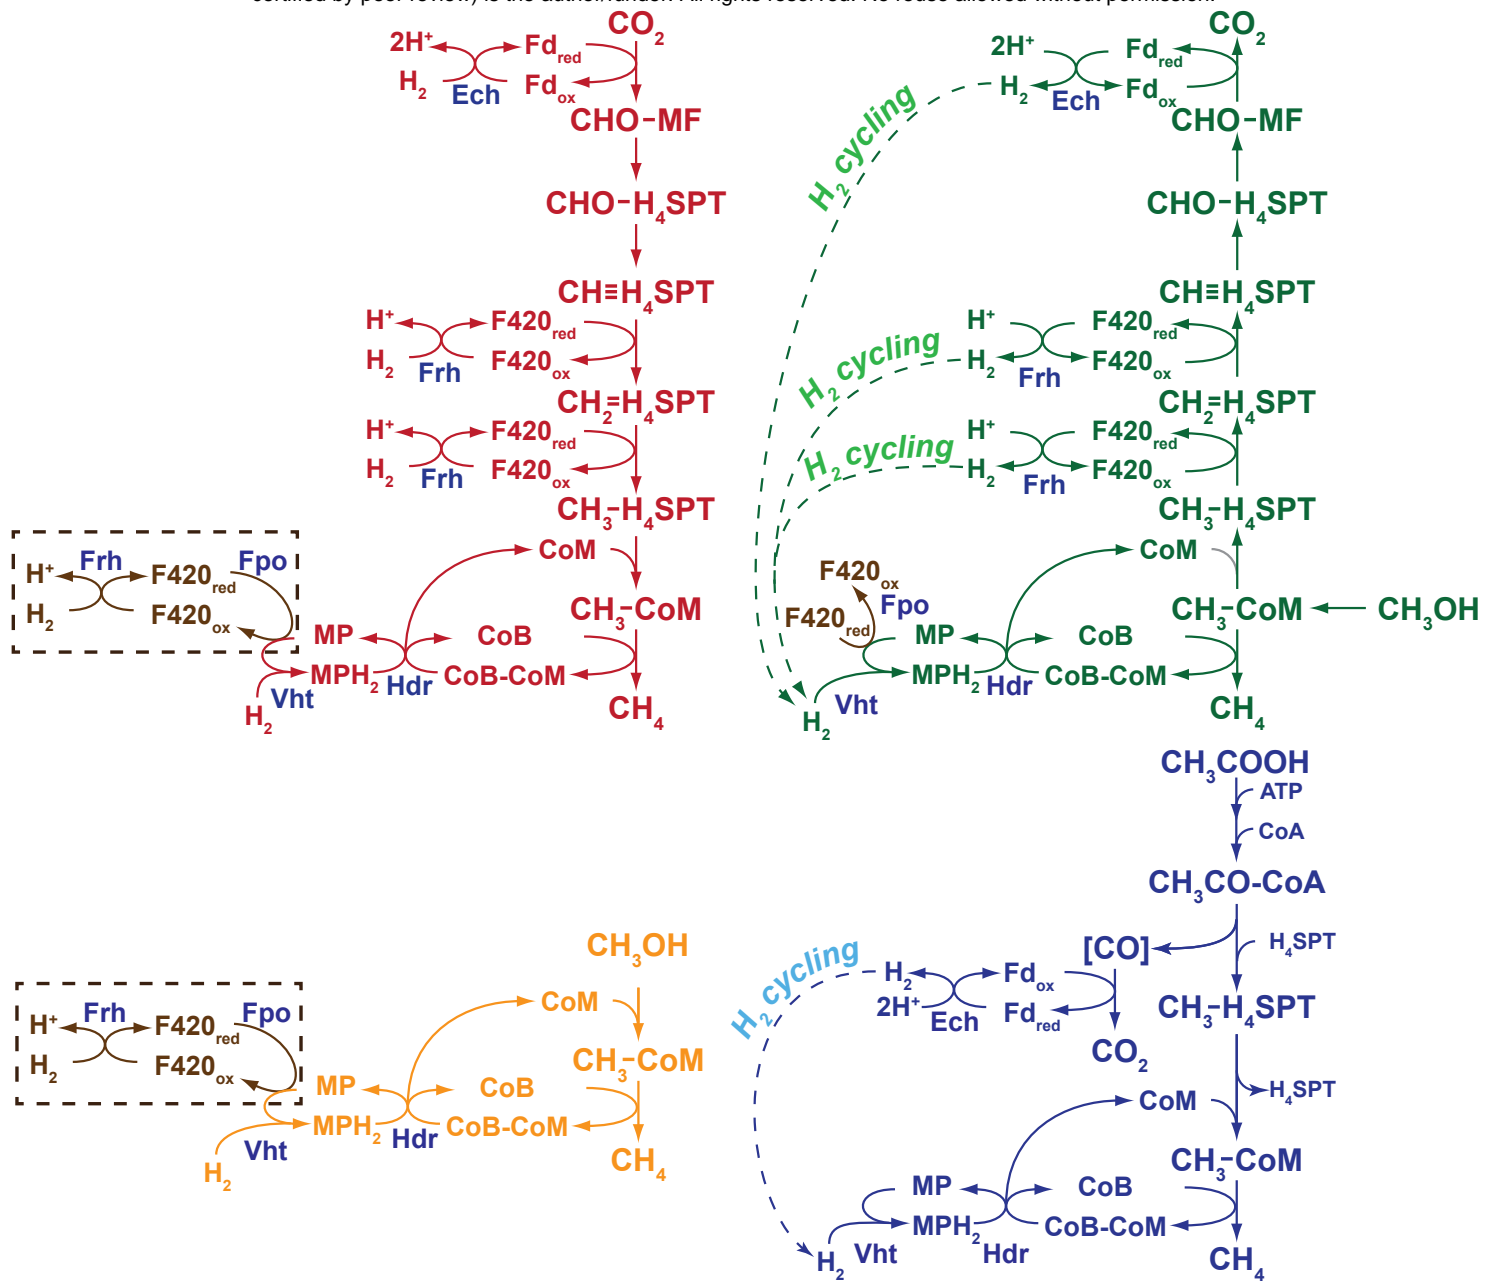

**Figure 4. The role of H<sub>2</sub> cycling in the four methanogenic pathways of *M. barkeri*.** *M. barkeri* utilizes four distinct methanogenic pathways to allow growth on a variety of substrates. In the hydrogenotrophic pathway (shown in red), CO<sub>2</sub> is reduced to methane using electrons derived from H<sub>2</sub>, while in the methyl-reducing pathway (shown in orange), H<sub>2</sub> is used to reduce C-1 compounds, such as methanol, directly to CH<sub>4</sub>. During methyl-trophic methanogenesis (shown in green), C-1 compounds are disproportionated to CO<sub>2</sub> and methane, with one molecule of the C-1 compound oxidized to provide electrons for reduction of three additional molecules to methane. Finally, in the aceticlastic pathway (shown in blue), acetate is split into a methyl group and an enzyme-bound carbonyl moiety. The latter is oxidized to CO<sub>2</sub> to provide electrons required for reduction of methyl group to methane. The steps catalyzed by Fpo, Frh, Vht, Ech and Hdr proteins are indicated. Steps involving H<sub>2</sub> cycling are shown as labeled, hyphenated arrows. An alternate, H<sub>2</sub>-independent electron transport pathway is shown in brown. Experimental data support the function of this alternate pathway during methyl-trophic methanogenesis, but not in hydrogenotrophic or methyl-reducing methanogenesis (as indicated by the hyphenated brown box). Abbreviations; Fpo, F420 dehydrogenase; Frh, F420-reducing hydrogenase; Vht, methanophenazine-dependent hydrogenase; Ech, energy-converting ferredoxin-dependent hydrogenase; Hdr, heterodisulfide reductase; CoM, coenzyme M; CoB, coenzyme B; CoB-CoM, mixed disulfide of CoB and CoM; MP/MPH<sub>2</sub>, oxidized and reduced methanophenazine; F420<sub>ox</sub>/F420<sub>red</sub>, oxidized and reduced cofactor F420; Fd<sub>ox</sub>/Fd<sub>red</sub>, oxidized and reduced ferredoxin; CHO-MF, formyl-methanofuran; H<sub>4</sub>SPT, tetrahydrosarcinapterin; CHO-H<sub>4</sub>SPT, formyl-H<sub>4</sub>SPT; CH≡H<sub>4</sub>SPT, methenyl-H<sub>4</sub>SPT; CH<sub>2</sub>=H<sub>4</sub>SPT, methylene-H<sub>4</sub>SPT; CH<sub>3</sub>-H<sub>4</sub>SPT, methyl-H<sub>4</sub>SPT; CH<sub>3</sub>-CoM, methyl-coenzyme M; CoA, coenzyme A; CH<sub>3</sub>CO-CoA, acetyl-coenzyme A; [CO], enzyme-bound carbonyl moiety; ATP, adenosine triphosphate.
